# Supplementary material
Source: PubMed Central journal article supplement (PMC3052965)
Supplement: NIHMS238481-supplement-01.pdf [file NIHMS238481-supplement-01.pdf]

## Supplemental Information

### Supplemental Methods and Materials

#### *Participant Exclusion Criteria*

Participants were also excluded for urine toxicology that was positive for cocaine and hearing impairment as measured with an audiometer (Grason-Stadler, Model GS1710). All subjects were able to detect tones at 30 dB (A) SPL at frequencies ranging from 250-4000 Hz.

#### *Medication Use*

Participants were not excluded from the study for medication use; however, given that the recruitment occurred in primary care rather than mental health clinics, the frequency of psychotropic medication use was not high. Specifically, 8 participants used antipsychotic medication (4 in PTSD+ group and 4 in PTSD- group,  $\chi^2 = 0.44$ , ns), 4 participants used benzodiazepines (2 in each group,  $\chi^2 = 0.22$ , ns), and 6 participants were on antidepressants, primarily SSRIs (4 in the PTSD+ group and 2 in the PTSD- group,  $\chi^2 = 2.05$ , ns).

#### *Conditioned (CSs) and Unconditioned Stimuli (US)*

CSs were colored shapes presented on a computer monitor for 6 sec. The airblast US was a 140 p.s.i. puff emitted by a compressed air tank attached to polyethylene tubing and controlled by a solenoid switch.

#### *Acoustic Startle Probes*

The startle probe was a 108-dB (A) SPL, 40-ms burst of broadband noise with near instantaneous rise time, delivered binaurally through headphones.

### *Electromyography (EMG) Data Collection*

The eyeblink component of the acoustic startle response was measured by EMG recordings of the right *orbicularis oculi* muscle with two 5-mm Ag/AgCl electrodes filled with electrolyte gel. One electrode was positioned 1 cm below the pupil of the right eye and the other was placed 1 cm below the lateral canthus. Impedance levels were less than 6 kilo-ohms for each participant.

### *EMG Signal Processing*

The acquired data were filtered, rectified, and smoothed using the MindWare software suite (MindWare Technologies, Ltd., Gahanna, OH) and exported for statistical analyses. The EMG signal was sampled at a frequency of 1 kHz and filtered with low- and high-frequency cutoffs at 28 and 500 Hz, respectively. The maximum amplitude of the eyeblink muscle contraction 20-200 ms after presentation of the startle probe was used as a measure of the acoustic startle response.
